1 **Changes and composition of microbial community during aerobic composting of**  
2 **household food waste**

3

4 Zhihua Jin<sup>a\*</sup>, Tong Lu<sup>b\*</sup>, Wenjun Feng<sup>a</sup>, Qinchao Jin<sup>a</sup>, Zhige Wu<sup>a</sup>, Yu Yang<sup>a#</sup>

5

6 \*Zhihua Jin and Tong Lu contributed equally to this work, Author order was  
7 determined both alphabetically and in order of increasing seniority.

8

9 <sup>a</sup>School of Biological and chemical engineering, Ningbo Tech University

10 <sup>b</sup>College of chemical and Biological engineering, Zhejiang University

11

12 **Running title:** microbial community of household food waste composting

13 **Keywords**

14 Household food waste, aerobic composting, microbial community, 16SrRNA high-  
15 throughput sequencing analysis

16

17 #Address correspondence to Yu Yang

18 [yangyu@nbt.edu.cn](mailto:yangyu@nbt.edu.cn)

19

20

21

22

23

24 **ABSTRACT**

25 In order to explore the effect of added bacteria on microbial community and  
26 determine the dominant bacteria in the aerobic composting process of household food  
27 waste (HFW), two groups of HFW composting experiments were conducted for 30  
28 days. The final degradation rates of the two groups were 69.95% (group A, natural  
29 composting) and 73.52% (Group C, composting with added bacteria), respectively.  
30 16S rRNA high-throughput sequencing was used to analyze the changes of microbial  
31 community in the composting process. As the result displays, at the classification of  
32 phylum level, the relatively abundant bacteria of two groups were *Firmicutes*,  
33 *Proteobacteria* and *Cyanobacteria*. At the classification of genus level, *Pediococcus*  
34 is the dominant bacteria of group A, which performed better in maintaining the  
35 microbial community stable in the later stage of composting, while *Weissella*  
36 accounted for a relatively large proportion of group C and behaved well in promoting  
37 the final degradation rate of composting. The proportion of *Ochrobactrum* in the early  
38 stage of group C is considerable and it is closely related to the removal of odour  
39 during composting. The relative abundance of added bacteria was always in a rather  
40 low level, suggested that the way they affect the composting process is to change the  
41 proportion of dominant bacteria in different stage of composting. This experiment  
42 provides an important reference for improving the microbial degradation efficiency of  
43 HFW .

44

45

46

## 47 **IMPORTANCE**

48 In recent years, food waste has gradually become a global problem, the annual waste  
49 of food is as high as 1.3 billion tons. FW, especially HFW, as a high content of  
50 organic matter waste, has a pretty good recycling value. So how to deal with and  
51 recycle it efficiently, quickly and conveniently becomes more and more important.

52 Among many treatment and recovery methods, microbial treatment (including  
53 anaerobic digestion and aerobic composting) has gradually become a research hotspot  
54 due to its advantages of low pollution and low energy consumption, and  
55 microorganisms play a crucial role in these process.

56 In this study we use 16S rRNA high-throughput sequencing method to explore aerobic  
57 composting of HFW. The purpose of this study is to find out the dominant bacteria  
58 which can improve the degradation efficiency, remove the odor and prolong the  
59 treatment cycle, and then provide further theoretical reference for future HFW related  
60 research.

## 61 **INTRODUCTION**

62 With the improvement of people's living standards , the proportion of food waste  
63 (FW) is also increasing year by year, being considered to be one of the largest groups  
64 of organic solid waste in the world, and its generation rate is rising steadily (1,2). FW  
65 mainly comes from household kitchens, restaurants, canteens, and food processing  
66 industries (3). Among them, household food waste (HFW) is getting much attention  
67 owing to its high organic content and excellent source of value added products (4).

68 About 1.3 billion tons of edible food are lost or wasted every year in the world (5), So  
69 the effective and harmless treatment of FW has always been the focus of global

70 attention (6,7).

71 At present, the treatment methods of FW mainly include direct crushing, dehydration,  
72 chemical treatment, incineration and microbial treatment etc(8). Most of these  
73 methods consume high energy and even cause secondary pollution to the environment  
74 except microbial treatment (9). Therefore, microbial treatment of FW has become a  
75 research hotspot at home and abroad. Microbial treatment methods include anaerobic  
76 digestion and aerobic composting, both are the process of decomposing complex  
77 organic matter into small molecule organic or inorganic matter by the metabolism of  
78 microorganisms (10). This process can be realized not only by indigenous  
79 microorganisms naturally growing in FW, but also by bacteria added during  
80 composting (11). Anaerobic digestion and aerobic composting have good resource  
81 recovery properties, and have the ability to produce high value-added products (12).  
82 Thus, microbial treatment methods present a good impetus and vast potential for  
83 future development (13). For instance, Quashie Frank Koblah, et al. use a continuous  
84 stirred microbial electrolysis cell (CSMEC) with anaerobic digestion to deal with FW  
85 and produce methanation and bioelectricity. The final COD removal of CSMEC  
86 surpassed 92% with OLR (organic load rate) ranging from 0.4 to 21.31 kg  
87 COD/m<sup>3</sup>·d, and *Firmicutes*, *Proteobacteria*, and *Euryarchaeota* were the dominant  
88 phyla observed (14). The natural composting method was implemented by Tran Huu  
89 Tuan et al. to study the degradation effect of high concentration of diethyl terephthalate  
90 (DOTP) FW by natural microorganisms proliferating during composting. The total  
91 degradation efficiency of DOTP reached 98%, and *Firmicutes* was the most dominant  
92 at the phylum level, followed by *Proteobacteria* and *Bacteroidetes* (15). Huang WY et

93 al. determined *Proteobacteria*, *Actinobacteria*, *Bacteroidetes* and *Firmicutes* as the  
94 main phyla during aerobic FW co-composting degradation of highly PCDD/F-  
95 contaminated field soil (16). Wang et al. reported that the dominant phyla of the  
96 community structure in fed-batch composting were *Firmicutes*, *Proteobacteria*,  
97 *Bacteroidetes*, and *Actinobacteria* by high-throughput sequencing (17) .  
98 Composting is an effective process for the valorisation of HFW into a stable and  
99 nutrient-enrich biofertiliser (18), in which a variety of microorganisms play a critical  
100 role (19). HFW is a kind of non-uniform material with high content of water, oil, salt  
101 and cellulose, etc (20). Gaseous emissions, such as methane (CH<sub>4</sub>), nitrous oxide  
102 (N<sub>2</sub>O), and ammonia (NH<sub>3</sub>) which hinder composting application for food waste  
103 treatment (21), are inherent by-products of the composting process regardless of the  
104 initial organic material or process condition (22). These particular characteristics will  
105 affect some aspects of the composting quality and process. As microorganisms play a  
106 key role in the composting process, inoculating microorganisms with specific  
107 functions may have a positive effect on the composting process and improve the  
108 composting quality. So far, there are few studies on the changes of microbial  
109 community in the process of HFW composting. In this study, 16SrRNA high-  
110 throughput sequencing was used to analyze the microbial community changes and  
111 composition in different stages of natural composting and composting with added  
112 bacteria, aiming to find out the dominant bacteria which can remove odor, improve  
113 the degradation rate and prolong the fermentation cycle in the composting process, so  
114 as to provide a theoretical reference for the future aerobic composting process of  
115 HFW.

## 116 **RESULT AND DISCUSSION**

### 117 **Analysis of degradation rate and viable count.**

118 Table 1 shows the changes of related parameters in different stages of composting  
119 process. The final degradation rates of group A and group C were 69.95% and 73.52%  
120 respectively. From the perspective of degradation rate, there was no significant  
121 difference between group A and group C. However, from the perspective of specific  
122 composting process, during stage 1-3, the odor produced by group C was significantly  
123 less than that by group A, and the composting residue of group C became looser and  
124 drier, which is helpful for the follow-up treatment of HFW. In terms of the proportion  
125 of composting residue in the machine volume, group C showed a good degradation  
126 efficiency in each stage of composting process, being consistent with the result of  
127 final degradation rate. From the change of pH in the composting, with the continuous  
128 addition of HFW, the pH values in the machine of two groups decreased gradually,  
129 while the pH value increased during 10 days naturally storage after the composting  
130 process, indicating that the composting process of HFW was an acidic process, which  
131 may be more suitable for the growth of some acidophilic strains. The total number of  
132 viable bacteria in group A was larger than that in group C. During the process from  
133 stage 1 to stage 2, the number of viable bacteria in group A decreased while that in  
134 group C increased, which may be as a result of the inhibitory effect between the added  
135 bacteria and the bacteria naturally growing during the composting process. In the later  
136 stage, the microbial community gradually stabilized and the number of viable bacteria  
137 began to increase, and then gradually decreased. The number of viable bacteria in the  
138 two groups decreased slowly from stage 3 to stage 5. The reason for this phenomenon

139 may be that the decline of pH value changed the composting environment of the  
140 microbial community, at the same time, the increase of composting residue in the  
141 machine volume leads to the decrease of oxygen content in the machine, leading to  
142 the decrease of aerobic composting bacteria. These two factors may be the key points  
143 of the decreasing of viable bacteria during stage 3-5.

#### 144 **Analysis of sample sequencing data.**

145 As shown in Table 2, after obtaining the original sequence data of different samples  
146 by Illumina high-throughput sequencing with optimization and statistics, the final  
147 number of effective sequences of 10 samples was 1286075, and the range of effective  
148 sequences of each sample was 121536-133111, of which 647227 were obtained from  
149 5 samples in group A and 638848 were obtained from 5 samples in group C. The  
150 average sequence length was 422.95 bp. Based on 97% sequence homology, a total of  
151 6626 OTUs were obtained, including 4144 OTUs in group A, and 3282 OTUs in  
152 group C. After filtering out the OTUs containing Chloroplast, 5949 OTUs were  
153 obtained, including 3804 OTUs in group A and 2945 OTUs in group C. The results of  
154 Venn diagram (Fig.1) showed that there were 800 OTUs shared by these two groups,  
155 accounting for 19.31% of group A and 24.38% of group C, respectively. By  
156 comparison, it was found that there was a significant difference in OTUs between the  
157 two groups, which might be due to the effect of the added bacteria on the composition  
158 and structure of microbial community.

#### 159 **Analysis of alpha diversity index of samples.**

160 Single sample diversity analysis (alpha diversity) reflects the abundance and diversity  
161 of microbial community. The alpha diversity index of each group is shown in Table 3.

162 The results showed that the Chao1 index and Shannon index of group A increased  
163 steadily, and reached the maximum value in A5. The Simpson index of group A  
164 reached 0.7867, 0.8860 and 0.8823 in A3, A4 and A5, respectively, indicating that the  
165 dominant bacteria of group A could be in a stable position for a long time in the  
166 middle and late composting period. The Simpson index could still maintain a high  
167 level in A5, indicating that the microbial community of group A has a good ability to  
168 maintain self-stabilization, which is very important for the extension of composting  
169 cycle. In group C, the Chao1 index and Shannon index of the microbial community  
170 fluctuated greatly, decreased firstly and then increased, and finally reached the  
171 maximum value of 1632 and 6.61 respectively in C3. The Chao1 index and Simpson  
172 index decreased significantly in C4 stage, which indicated that the microbial  
173 community abundance decreased greatly and the dominant strains maintained stable  
174 only for a short time. The Chao1 index and Simpson index in C5 stage continued to  
175 decline, indicating that the ability of group C to maintain community stable was not as  
176 good as that of group A. The sequencing coverage of samples in each group was  
177 above 0.99, indicating that the sequencing had high coverage of bacteria in samples  
178 and suitable sequencing depth, which could meet the needs of bacterial diversity  
179 analysis in each group. Fig. 2 A and B show the changes of coverage index and  
180 Shannon index with the increase of sequencing depth, respectively. It can be seen  
181 from the Fig. 2 that the coverage index and Shannon index in each group of samples  
182 gradually increased and tend to be flat with the increasing of sequencing depth, which  
183 further indicates that the sequencing results can more comprehensively reflect the  
184 diversity information contained in these samples.



185 **Analysis of bacteria composition during composting process at phylum level.**

186 Fig. 3 shows the bacteria composition in different stages at the level of phyla  
187 classification. The main bacteria phyla in stage1 is: A1: *Proteobacteria* (98.81%),  
188 *Firmicutes* (0.64%); C1: *Proteobacteria* (90.03%), *Firmicutes* (5.86%),  
189 *Actinobacteria* (2.66%). The relative abundance of *Proteobacteria* in the two groups  
190 of samples in stage1 both exceeded 90%, indicating that *Proteobacteria* is in an  
191 absolutely dominant position in both A1 and C1. Many bacteria of *Proteobacteria* are  
192 pathogenic (23), such as *Cronobacter* (24), *Burkholderia* (25,26) and *Ochrobactrum*  
193 (27). The main bacteria phyla in stage2 is: A2: *Firmicutes* (96.23%), *Proteobacteria*  
194 (3.07%); C2: *Firmicutes* (96.60%), *Proteobacteria* (2.62%). In stage 2, the type and  
195 proportion of bacteria phyla in A2 and C2 periods were almost the same and the  
196 proportion of *Firmicutes* rose rapidly from stage 1 to stage 2 and replaced  
197 *Proteobacteria* as the dominant bacteria phyla. The phylum *Firmicutes* includes  
198 Gram-positive bacteria with rigid or semi-rigid cell walls that are predominantly from  
199 the genera *Bacillus*, *Clostridium*, *Enterococcus*, *Lactobacillus* and *Ruminococcus* (28).  
200 Moreover, many *Firmicutes* produce spores that are resistant to dehydration and  
201 extreme environments (29), which may be one of the reasons why group A had a  
202 strong ability to maintain stable in the late stage, of which the proportion of  
203 *Firmicutes* was more than 80%. The main bacteria phyla in stage3 is: A3: *Firmicutes*  
204 (66.67%), *Cyanobacteria* (26.73%), *Proteobacteria* (4.89%); C3: *Firmicutes*  
205 (49.09%), *Proteobacteria* (40.84%), *Actinobacteria* (2.70%), *Bacteroidetes* (2.70%),  
206 *Acidobacteria* (1.19%). The emergence of *Cyanobacteria* in A3 led to a decrease in  
207 the proportion of *Firmicutes*. Those bloom-forming *Cyanobacteria* may have a certain

208 inhibitory effect on pathogenic bacteria of *Proteobacteria*, because some genera of it  
209 possess the ability to produce various toxic or bioactive secondary metabolites, e.g.  
210 toxic microcystins (MCs) and bioactive anabaenopeptins (APs) which is linked to  
211 antibacterial, fungal or cytostatic effects (30). In contrast, the proportion of  
212 *Proteobacteria* in C3 period increased greatly without *Cyanobacteria* existing, further  
213 proving that the emergence of *cyanobacteria* in A3 could inhibit the proliferation of  
214 the pathogenic bacteria of *Proteobacteria*. The main bacteria phyla in stage4 is: A4:  
215 *Firmicutes* (93.66%), *Proteobacteria* (2.34%), *Cyanobacteria* (1.90%); C4:  
216 *Firmicutes* (78.89%), *Cyanobacteria* (15.64%), *Proteobacteria* (4.64%). *Firmicutes*  
217 still occupied the dominant position in A4, while the proportion of *Proteobacteria* in  
218 C4 decreased significantly with a small amount of *Cyanobacteria* appeared, which  
219 confirmed once again the inhibitory effect of *Cyanobacteria* on pathogenic bacteria of  
220 *Proteobacteria*. The main bacteria phyla in stage 5 is: A5: *Firmicutes* (82.30%),  
221 *Cyanobacteria* (6.87%), *Proteobacteria* (5.08%), *Bacteroidetes* (2.93%),  
222 *Actinobacteria* (2.15%); C5: *Firmicutes* (54.40%), *Proteobacteria* (2.44%),  
223 *Cyanobacteria* (42.61%). The proportion of *Firmicutes* in A5 was about 30% more  
224 than that in C5, indicating that the relative abundance of dominant phyla in group A  
225 could still maintain at a high level after ten days of storage, indicating that group A  
226 had a good ability to maintain community stable.

#### 227 **Analysis of bacteria composition during composting process at genus level.**

228 As shown in Fig. 4, at the level of genus classification, the relatively abundant  
229 bacterial genera in the A1 are *Cronobacter* (57.44%),  
230 unclassified *Enterobacteriaceae* (24.75%), *Burkholderia-Caballeronia-*

231 *ParaBurkholderia* (15.24%). These three genera belonging to *Proteobacteria* are all  
232 opportunistic pathogens. Now, 10 individual species of *Cronobacter* have been  
233 identified (31,32), which are associated with necrotizing enterocolitis, septicemia, and  
234 meningitis (33). *Enterobacteriaceae* family can contaminate fresh products at any  
235 stage of production either at pre-harvest or post-harvest stages (34). Many species of  
236 *Burkholderia* are opportunistic pathogens, such as *Burkholderia pseudomallei* that  
237 causes melioidosis (35) and *Burkholderia cepacia* that causes cystic fibrosis in human  
238 lungs (36,37). The relatively abundant bacterial genera in C1 is *Ochrobactrum*  
239 (84.61%), and the proportion of added bacteria is: *Bacillus* (1.89%), *Pseudomonas*  
240 (0.24%), *Paenibacillus* (0.01%). Similarly, *Ochrobactrum* also belongs to the  
241 *Proteobacteria*, and several *Ochrobactrum* spp. have been investigated for their  
242 potential to degrade xenobiotic pollutants and for heavy metal detoxification under a  
243 variety of environmental conditions (38). Moreover, the odour of group C in the early  
244 stage of composting was significantly smaller than that of group A. Therefore,  
245 *Ochrobactrum* may play a better role in degradation and deodorization of HFW in the  
246 early stage of composting. However, in the early stage, the proportion of added  
247 bacteria is less, which may be caused by the small initial addition or the inhibition of  
248 the growth of pathogenic bacteria. It can be clearly seen that the types and proportions  
249 of the dominant bacteria in the two groups in the early stage of composting are quite  
250 different, but at the level of phylum classification they all belong to *Proteobacteria*.  
251 The reason for this result may be that the presence of added bacteria affects the  
252 proportion of the dominant bacteria during the process of composting. The relatively  
253 abundant bacteria genera in the A2 are *Pediococcus* (93.12%), *Klebsiella* (1.40%),

254 while that in the C2 are *Pediococcus* (94.82%), *Ochrobactrum* (1.29%), and the  
255 proportion of added bacteria is: *Bacillus* (0.38%), *Pseudomonas* (0.021%),  
256 *Paenibacillus*(0.02%). Obviously different from the first stage, the dominant bacteria  
257 in both A2 and C2 are *Pediococcus* belonging to *Firmicutes* and the relative  
258 abundance of them are both more than 90%. Literature review shows that  
259 *Pediococcus* can secrete pediocins which are short peptides with strong antibacterial  
260 activity, high temperature resistance, and acid resistance in the process of proliferation  
261 (39). It is noteworthy that the proportion of pathogenic bacteria in A2 and C2 drops  
262 dramatically. It is inferred that the pediocins secreted by *Pediococcus* inhibit and  
263 control the opportunistic pathogens at a low level. Meanwhile, the proportion of added  
264 bacteria is still maintained at a relatively low level, which may be due to the  
265 inhibitory effect of the proliferation of *Pediococcus*. The relatively abundant bacterial  
266 genera in A3 are *Pediococcus* (57.01%), *Bacillus* (2.53%), *Enterococcus* (1.33%), and  
267 some Chloroplast (26.73%). The proportion of *Pediococcus* in A3 decreased to a  
268 certain extent, and a small amount of Chloroplast appeared, which may be as a result  
269 of incomplete degradation of vegetables in HFW. The main genera of C3 are  
270 *Pediococcus* (20.73%), *Lactobacillus* (10.10%), *Proteus* (8.64%), *Acinetobacter*  
271 (7.65%), *Klebsiella* (7.08%) and *Oceanobacillus* (6.74%). Among these genera,  
272 *Proteus*, *Acinetobacter* and *Klebsiella* are all opportunistic pathogen. *Proteus* consists  
273 of five species and three unnamed subspecies. Among these species, *P. vulgaris* and *P.*  
274 *mirabilis* are most frequently linked with food contamination and food poisoning  
275 (40,41). The non-fermentative bacteria of *Acinetobacter* are opportunistic  
276 pathogens, for instance, *Acinetobacter Baumannii* has emerged as one of the most

277 problematic common opportunistic nosocomial pathogens worldwide (42). The most  
278 common species of *Klebsiella* is *Klebsiella Pneumoniae*, a conditional pathogen that  
279 can settle in human skin and mucous membranes to cause urinary tract infections,  
280 sepsis and pneumonia in individuals with weakened immunity (43,44).The  
281 *Lactobacillus*, of which the relative abundance increased in C3, is a kind of probiotics  
282 widely existing in human intestinal tract (45), and may play an important role in  
283 inhibiting those opportunistic pathogens. The proportion of added bacteria in C3 is:  
284 *Bacillus* (2.21%), *Pseudomonas* (0.68%), *Paenibacillus*(0.11%), increased slightly,  
285 but still at a low level, which may be due to the low pH and high salt concentration. In  
286 C3, the proportion of *Pediococcus* decreased significantly, and a large number of  
287 miscellaneous bacteria appeared. The reason for this phenomenon may be that when  
288 the proportion of *Pediococcus* decreased and *Weissella* did not occupy the dominant  
289 position in the middle stage of composting, these pathogenic bacteria and  
290 miscellaneous bacteria took this opportunity to proliferate and occupy a certain  
291 proportion. As the proportion of *Weissella* increased in later stage, the relative  
292 abundance of these miscellaneous bacteria decreased sharply to a very low level.  
293 Members of the genus *Oceanobacillus* were aerobic, rod-shaped, endospore-forming,  
294 halophilic bacteria (46). The increase of *Oceanobacillus* in C3 may be due to the  
295 rising of salt concentration in the middle stage of composting. The relative abundance  
296 of bacteria genera of Stage 4 was as follows, A4: *Pediococcus* (41.39%), *Weissella*  
297 (34.97%), *Leuconostoc* (5.68%), *Bacillus* (2.08%), *Lactobacillus* (1.55%),  
298 *Macrocococcus* (1.55%); C4: *Weissella* (70.89%), *Leuconostoc* (3.07%), *Acinetobacter*  
299 (1.16%), and added bacteria of *Bacillus* (0.46%), *Pseudomonas* (0.06%),

300 *Paenibacillus* (0.05%). The proportion of *Weissella* in A4 and C4 increased greatly,  
301 more than 70% in C4, indicating that *Weissella* played a greater role in the later stage  
302 of composting. It should be noted that *Weissella* also belonged to *Firmicutes*. To this  
303 day, 19 species of *Weissella* have been identified, such as *W. beninensis*, *W. ceti*, *W*  
304 *cibaria*, *W. confuse* etc(47,48)<sup>1</sup>. Among them, *W. confuse* and *W. cibaria* have the  
305 potential of anticancer, anti-inflammatory, antibacterial, antifungal and enhancing  
306 immunity (49,50,51), which may be beneficial to the synergistic effect of  
307 *Pediococcus* and *Weissella* in the middle and later stage of composting. The relative  
308 abundance of bacteria genera of Stage 5 was as follows, A5: *Pediococcus* (47.51%),  
309 *Weissella* (20.21%), *Bacillus* (2.60%), *Leuconostoc* (2.25%), *Bacteroides* (1.25%);  
310 C5: *Weissella* (47.99%), *Leuconostoc* (3.86%), and added bacteria of *Bacillus*  
311 (0.20%), *Pseudomonas* (0.11%), *Paenibacillus*(0.01%),and also some Chloroplast  
312 (42.61%). Both A5 and C5 were the state of natural storage for 10 days after the end  
313 of composting. In A5, *Pediococcus* still occupied the dominant position, followed by  
314 *Weissella*. In C5 period, the proportion of *Weissella* decreased significantly, and a  
315 large proportion of Chloroplast (42.61%) appeared, which may be caused by  
316 incomplete degradation of vegetable wastes. Chloroplast has appeared in the  
317 composting components since Stage 3, and always occupies a certain proportion  
318 during stage3-stage5, indicating that the microbial bacteria is still relatively limited in  
319 the degradation of vegetable waste. In the future composting process, strains with  
320 strong cellulose degrading ability can be added and their comprehensive degradation  
321 effect need to be determined. The proportion of added bacteria was maintained at a  
322 low level during C1-C5, indicating that the added bacteria were not the dominant

323 strains in the process of composting, and it is possible that the way they affect the  
324 composting process is to change the relative abundance of dominant bacteria in  
325 different stage of composting(Fig. S1).

### 326 **Analysis of Beta diversity.**

327 Through PCoA we can study the similarity and difference of data. Fig. 5 shows the  
328 PCoA results of different samples in genus level. It can be seen from Fig. 5 that PC1  
329 is the first principal coordinate component, and its contribution to the  
330 representativeness of the total bacteria is 49.4%; PC2 is the second principal  
331 component, and its contribution to the representativeness of the total bacteria is  
332 26.6%; for the PC1-2 analysis of the principal component, A1 and C1 are farther apart  
333 on the coordinate axis, indicating that the added bacteria may have a significant  
334 impact on the composition of the microbial community at the early stage of the HFW  
335 composting process. A2 and C2 are almost at the same position, indicating that the  
336 microbial community composition of A2 and C2 at the genus level is almost the same  
337 at this stage, and that the added bacteria species at this stage has little effect on the  
338 microbial community. A4 and C4 are far apart on the coordinate axis, indicating that  
339 the groups A and C have a large difference in the composting process in the later  
340 stage. The added bacteria may affect the proportion of dominant bacteria in different  
341 stages of the composting process to improve the composting rate and other critical  
342 factors.

### 343 **CONCLUSION**

344 The above analysis shows that at phylum level, *Firmicutes*, *Proteobacteria* and  
345 *Cyanobacteria* accounted for the largest proportion during the composting process of

346 group A and C. At genus level, *Pediococcus* and *Weissella* were the dominant bacteria  
347 of group A and C, and both of them belonged to *Firmicutes*. The abundance of the  
348 added bacteria in the composting process of group C is always at a low level,  
349 indicating that the added bacteria may affect the composting process by changing the  
350 proportion of the dominant strains. The relative abundance of pathogenic bacteria  
351 decreased to a very low level after *Pediococcus* and *Weissella* gradually increased and  
352 occupied a dominant position in the middle stage of the two groups, indicating that  
353 *Pediococcus* and *Weissella* might play a certain inhibitory role on pathogenic bacteria.  
354 *Weissella* is the dominant bacteria in group C, and the final degradation rate of group  
355 C is higher than that of group A, indicating that *Weissella* may play a positive role in  
356 improving the degradation efficiency. In C1, the *Ochrobactrum* occupied a  
357 considerable proportion and the smell during this stage is obviously better than that of  
358 group A, indicating the *Ochrobactrum* may have an active impact on the removal of  
359 peculiar smell. Group A performed better in stabilizing the microbial community in  
360 the later stage and the *Pediococcus* took a rather high proportion during the  
361 composting process of group A, indicating that *Pediococcus* have the ability of  
362 maintaining system stable and prolonging the composting cycle.

363 In conclusion, the microbial communities of the two groups during the composting  
364 process of HFW have a high degree of diversity. There are not only differences in  
365 species distribution and relative abundance but also common core bacteria between  
366 them. In this paper, the study of microbial community changes in the composting  
367 process of HFW is helpful to explore the microbial resource pool, deepen the  
368 understanding of the composting process of HFW, and is of great significance for the



369 further harmless resource treatment of HFW.

## 370 **MATERIALS AND METHODS**

### 371 **Materials.**

372 The HFW was collected from the dining hall of Ningbo Tech University; The added  
373 bacteria are: B2 (*Bacillus subtilis*), F4 (*Pseudomonas aeruginosa*), 303 (*Paenibacillus*  
374 *lautus*), 792 (*Bacillus thuringiensis*), which are all preserved in our laboratory;  
375 Sawdust; LB broth medium; 75510-019 Agarose (Invitrogen); Non-fat milk powder;  
376 NEB M0491L Q5® High-Fidelity DNA Polymerase (New England Biolabs (NEB));  
377 P7598 Quant-iT PicoGreen dsDNA Assay Kit (Invitrogen); DL2000 Marker (Takara);  
378 AM9870 TAE (Invitrogen).

### 379 **Equipment.**

380 Small HFW treatment machine (Midea Group); Freeze dryer; pH meter; ABI 2720  
381 PCR amplify instrument (ABI); FLX800T type enzyme labelling instrument (BioTek  
382 Proton Instrument Co., Ltd.); DYY-6C electrophoresis apparatus (Beijing 61  
383 Biological Technology Co., Ltd.); Microplate reader (BioTek, FLx800); BG-  
384 gdsAUTO (130) gel imaging system (Beijing Bai Jing Biotechnology Co., Ltd.)

### 385 **Preparation of bacteria freeze-dried powder.**

386 These added bacteria which was preserved on slant culture medium were inoculated  
387 200 ml LB medium (sterilized at 121 ° C for 20 min), and then cultured in a constant  
388 shaker at 37 ° C, 200 rpm for 24 h. After culture, the broth was centrifugated at 4 ° C  
389 for 15 min at 8000 rpm and the supernatant was discarded, and the bacteria precipitate  
390 were thoroughly mixed with 5-10 ml of non-fat milk (sterilized at 100 ° C for 10 min)  
391 and poured into the plate. After sealing the plastic wrap (poking several small holes)

392 and pre freezing at - 4 ° C for 2 h, the plate was freeze-dried using a freeze dryer for  
393 18 h, and then distributed into 10 ml EP tube (sterilized at 121 ° C for 20 min) and put  
394 into 4 ° C freezer for further use (about 5 g of freeze-dried powder can be made for  
395 every 200 ml of broth, the viable bacterial count of freeze-dried powder was about 10<sup>9</sup>  
396 CFU/ g).

### 397 **Experimental grouping and treatment.**

398 This experiment was divided into two groups: group A (natural composting) and  
399 group C (composting with added bacteria), and the composting process was carried  
400 out in the HFW treatment machine. 500g sawdust was added at the beginning of  
401 composting of two groups. In group C, 5g freeze-dried powder with four kinds of  
402 added bacteria was added, and 500g ~ 600g HFW was added at 1 pm every day. The  
403 residue in the machine was sampled every two days to determine the number of viable  
404 bacteria and the pH value, and 20g sample was stored in the refrigerator at - 70 ° C for  
405 subsequent 16S rRNA sequencing analysis. The composting process sustained 20  
406 days, and after that the composting residue was naturally stored for 10 days. The  
407 composting samples on the 1st, 7th, 15th, 20th and 30th days were taken for 16S  
408 rRNA sequencing analysis, named stage1-stage5. At the end of experiment, the weight  
409 of composting residue was measured and the degradation rate was calculated. The  
410 degradation rate can be calculated according to the following formula:

411 Degradation rate (%)=  $(X_1 - X_2 + X_3) / X_1$

X<sub>1</sub>—Total weight of HFW added (g)

X<sub>2</sub>—Weight of composting residue in the machine (g)

X<sub>3</sub>—Weight of sawdust added (g)

412 **High throughput sequencing of 16S rRNA.**

413 According to the experience, the most suitable method of total DNA extraction was  
414 utilized for different sources of microbiome samples. At the same time, DNA was  
415 quantified by Nanodrop and the quality of DNA was detected by 1.2% agarose gel  
416 electrophoresis.

417 Generally, the target sequences, such as ribosomal RNA or specific gene fragments,  
418 which can reflect the composition and diversity of microbial community, are used to  
419 design primers according to the V3 ~ V4 region of 16SrRNA gene, and the specific  
420 barcode sequence was added to amplify the rRNA gene variable region (single or  
421 continuous multiple) or specific gene fragment by PCR.

422 The PCR amplification adopts PFU high fidelity DNA polymerase (TransGen  
423 Biotech), and the number of amplification cycles were strictly controlled, so as to  
424 make the number of cycles as low as possible and ensure the same amplification  
425 conditions of the same batch of samples. At the same time, a negative control was set,  
426 which can detect environmental, reagent and other microbial contamination, and any  
427 negative control amplification samples with bands can not be used for subsequent  
428 experiments. The related information are shown in table 4.

429 **Fluorescence quantification of amplification products.**

430 The PCR products were quantified by fluorescent reagent quant (Quant-iT PicoGreen  
431 dsDNA Assay Kit), and the quantitative instrument is Microplate reader (BioTek,  
432 FLx800). According to the results of fluorescent quantitative analysis, the samples  
433 were mixed according to the corresponding proportion according to the sequencing  
434 requirements of each sample.

435 **Construction and sequencing of Illumina Library.**

436 Illumina high-throughput sequencing and bioinformatics analysis were performed  
437 with the assistance of Personalbio Biotechnology Co. Ltd. (Shanghai).

438 **ACKNOWLEDGMENTS**

439 We would like to thank the staff working at the dining hall of Ningbo Tech University  
440 for kindly offering us the household food waste. In addition, a particular thanks goes  
441 to Personalbio Biotechnology Co. Ltd. (Shanghai) for sample testing and chart  
442 making. This work was financially supported by Zhejiang Provincial Department of  
443 Education (item Number: Y201941839).

444 We declare that we have no competing interests.

445

446

447

448 **REFERENCE**

- 449 1. Elkhalfi S, Al-Ansari T, Mackey HR, McKay G. 2019. Food waste to biochars  
450 through pyrolysis: a review. *Resour Conserv Recycl* 144:310-320.
- 451 2. Shen YF. 2020. A review on hydrothermal carbonization of biomass and plastic  
452 wastes to energy products. *Biomass Bioenergy* 134:105479-105496.
- 453 3. Barik S, Paul KK. 2017. Potential reuse of kitchen food waste. *J Environ Chem*  
454 *Eng* 5:196-204.
- 455 4. Sindhu R, Gnansounou E, Rebello S, Binod P, Varjani S, Thakur IS, Nair RB,  
456 Pandey A. 2019. Conversion of food and kitchen waste to value-added products.  
457 *Environ Manage* 241:619-630.
- 458 5. Xiong XN, Yu IKM, Tsang DCW, Bolan NS, Ok YS, Igalavithana AD, Kirkham

- 459 MB, Kim KH, Vikrant K. 2019. Value-added chemicals from food supply chain  
460 wastes: state-of-the-art review and future prospects. *Chem Eng J* 375:121983-  
461 122006.
- 462 6. Kim S, Lee Y, Lin KY, Hong E, Kwon EE, Lee J. 2020. The valorization of food  
463 waste via pyrolysis. *J Clean Prod.* 259 :120816-120828.
- 464 7. Su H, Zhou X, Zheng R, Zhou Z, Zhang Y, Zhu G, Yu C, Hantoko D, Yan M.  
465 2021. Hydrothermal carbonization of food waste after oil extraction pre-  
466 treatment: Study on hydrochar fuel characteristics, combustion behavior, and  
467 removal behavior of sodium and potassium. *Sci Total Environ* 754:142192-.
- 468 8. Yin Y, Liu YJ, Meng SJ, Kiran EU, Liu Y. 2016. Enzymatic pretreatment of  
469 activated sludge, food waste and their mixture for enhanced bioenergy recovery  
470 and waste volume reduction via anaerobic digestion. *Appl Energy* 179:1131-1137.
- 471 9. Al-Wahaibi A, Osman AI, Al-Muhtaseb AH, Alqaisi O, Baawain M, Fawzy S,  
472 Rooney DW. 2020. Techno-economic evaluation of biogas production from food  
473 waste via anaerobic digestion. *Sci Rep* 10, 15719.
- 474 10. Cáceres R, Malińska K, Marfà O. 2018. Nitrification within composting: A  
475 review. *Waste Manag* 72:119-137.
- 476 11. Sánchez ÓJ, Ospina DA, Montoya S. 2017. Compost supplementation with  
477 nutrients and microorganisms in composting process. *Waste Manag* 69:136-153.
- 478 12. Bernstad A, la Cour Jansen J. 2012. Review of comparative LCAs of food waste  
479 managementsystems: Current status and potential improvements. *Waste Manag*  
480 32(12):2439-2455.
- 481 13. Szeki-Lin C, Pfaltzgraff LA, Herrero-Davila L, Mubofu EB, Abderrahim S, Clark  
482 JH, Koutinas AA, Kopsahelis N, Stamatelatou K, Dickson F, Thankappan S,  
483 Mohamed Z, Brocklesby R, Luque R. 2013. Food waste as a valuable resource

- 484 for the production of chemicals, materials and fuels. Current situation and global  
485 perspective. *Energy Environ Sci.* 6(2):426-464.
- 486 14. Quashie FK, Feng K, Fang A, Agorinya S, Antwi P, Kabutey FT, Xing D. 2021.  
487 Efficiency and key functional genera responsible for simultaneous methanation  
488 and bioelectricity generation within a continuous stirred microbial electrolysis  
489 cell (CSMEC) treating food waste. *Sci Total Environ* 757:143746.
- 490 15. Tran HT, Lin C, Bui XT, Itayama T, Dang BT, Cheruiyot NK, Hoang HG, Vu CT.  
491 2021. Bacterial community progression during food waste composting containing  
492 high dioctyl terephthalate (DOTP) concentration. *Chemosphere* 265:129064.
- 493 16. Huang WY, Ngo HH, Lin C, Vu CT, Kaewlaoyoong A, Boonsong T, Tran HT, Bui  
494 XT, Vo TD, Chen JR. 2019. Aerobic co-composting composting of highly  
495 PCDD/F-contaminated field soil. A study of bacterial community. *Sci Total*  
496 *Environ* 660:595-602.
- 497 17. Wang X, Pan S, Zhang Z, Lin X, Zhang Y, Chen S. 2017. Effects of the feeding  
498 ratio of food waste on fed-batch aerobic composting and its microbial community.  
499 *Bioresour Technol* 224:397-404.
- 500 18. Lin L, Xu FQ, Ge XM, Li YB. 2018. Improving the sustainability of organic  
501 waste management practices in the food-energy-water nexus: a comparative  
502 review of anaerobic digestion and composting. *Renew Sust Energ Rev* 89:151-  
503 167.
- 504 19. Onwosi CO, Igbokwe VC, Odimba JN, Eke IE, Nwankwoala MO, Iroh IN,  
505 Ezeogu LI. 2017. Composting technology in waste stabilization: On the methods,  
506 challenges and future prospects. *Environ Manage.* 190:140-157.
- 507 20. Cerda A, Artola A, Font X, Barrena R, Gea T, Sánchez A. 2018. Composting of  
508 food wastes: Status and challenges. *Bioresour Technol.* 248(Pt A):57-67.

- 509 21. Yang F, Li Y, Han Y, Qian W, Li G, Luo W. 2019. Performance of mature  
510 compost to control gaseous emissions in kitchen waste composting. *Sci Total*  
511 *Environ.* 657:262-269.
- 512 22. Maulini-Duran C, Artola A, Font X, Sanchez A. 2014. Gaseous emissions in  
513 municipal wastes composting: effect of the bulking agent. *Bioresour Technol*  
514 172:260-268
- 515 23. Madigan M, Martinko J (eds.). 2005. *Brock Biology of Microorganisms* 11th.  
516 Prentice Hall ISBN 0-13-144329-1.
- 517 24. Jia X, Hua J, Liu L, Xu Z, Li Y. 2018. Phenotypic characterization of pathogenic  
518 *Cronobacter* spp. strains. *Microb Pathog* 121:232-237.
- 519 25. Rachlin A, Mayo M, Webb JR, Kleinecke M, Rigas V, Harrington G, Currie BJ,  
520 Kaestli M. 2020. Whole-genome sequencing of *Burkholderia pseudomallei* from  
521 an urban melioidosis hot spot reveals a fine-scale population structure and  
522 localised spatial clustering in the environment. *Sci Rep* 10(1):383-416.
- 523 26. Mareya CR, Tugizimana F, Di Lorenzo F, Silipo A, Piater LA, Molinaro A,  
524 Dubery IA. 2020. Adaptive defence-related changes in the metabolome of  
525 *Sorghum bicolor* cells in response to lipopolysaccharides of the pathogen  
526 *Burkholderia andropogonis*. *Sci Rep* 10(6):134-54.
- 527 27. Medeiros E, Tang K, Hu S, Shah A. 2020. *Ochrobactrum* Peritonitis: Case Report  
528 and Literature Review. *Cureus* 12(9):e10564.
- 529 28. Stojanov S, Berlec A, Štrukelj B. 2020. The Influence of Probiotics on the  
530 Firmicutes/Bacteroidetes Ratio in the Treatment of Obesity and Inflammatory  
531 Bowel disease. *Microorganisms* 8(11):1715.
- 532 29. Taib N, Megrian D, Witwinowski J, Adam P, Poppleton D, Borrel G, Beloin C,  
533 Gribaldo S. 2020. Genome-wide analysis of the Firmicutes illuminates the

- 534 diderm/monoderm transition. *Nat Ecol Evol* 4(12):1661–1672.
- 535 30. Kurmayer R, Entfellner E, Weisse T, Offterdinger M, Rentmeister A, Deng L.  
536 2020. Chemically labeled toxins or bioactive peptides show a heterogeneous  
537 intracellular distribution and low spatial overlap with autofluorescence in bloom-  
538 forming cyanobacteria. *Sci Rep* 10(1):471-483.
- 539 31. Holý O, Forsythe S. 2014. *Cronobacter* spp. as emerging causes of healthcare-  
540 associated infection. *J Hosp Infect* 86:169–177.
- 541 32. Joseph S, Cetinkaya E, Drahovska H, Levican A, Figueras MJ, Forsythe SJ. 2012.  
542 *Cronobacter condimenti* sp. nov., isolated from spiced meat, and *Cronobacter*  
543 *universalis* sp. nov., a species designation for *Cronobacter* sp. genomospecies 1,  
544 recovered from a leg infection, water and food ingredients. *Int Syst Evol*  
545 *Microbiol* 62:1277–1283.
- 546 33. Forsythe SJ. 2018. Updates on the *Cronobacter* Genus. *Annu Rev Food Sci*  
547 *Technol* 9:23-44.
- 548 34. Osaili TM, Alaboudi AR, Al-Quran HN, Al-Nabulsi AA. 2018. Decontamination  
549 and survival of *Enterobacteriaceae* on shredded iceberg lettuce during storage.  
550 *Food Microbiol* 73:129-136.
- 551 35. Duangurai T, Reamtong O, Rungruengkitkun A, Srinon V, Boonyuen U,  
552 Limmathurotsakul D, Chantratita N, Pumirat P. 2020. In vitro passage alters  
553 virulence, immune activation and proteomic profiles of *Burkholderia*  
554 *pseudomallei*. *Sci Rep* 10(1):201-210.
- 555 36. Hu J, Qiao XF, Wei L, Mi BZ. 2016. Isolation and identification of *Burkholderia*  
556 *cepacia* and disinfectant inactivation test. *Environ Eng* 34(S1):6-8.
- 557 37. Yang B, Ma HL, Shou YW, Zhang XL, Qin C. 2017. Distribution of *Burkholderia*  
558 *cepacia* infections in ICUs and drug resistance. *Chin J Nosocomiol* 27(21):4822-



- 559 4825.
- 560 38. Ryan MP, Pembroke JT. 2020. The Genus *Ochrobactrum* as Major Opportunistic  
561 Pathogens. *Microorganisms* 8(11): 1797.
- 562 39. Qin LM, Sun AY, Wang QW, Gao JW, Wei DZ. 2017. Improvement of pediocin  
563 yield by a novel high residual sugar and re-alkalized feeding strategy. *J Shandong*  
564 *University (Medical Edition)* 55 (9):41-45.
- 565 40. O'Hara CM, Brenner FW, Miller JM. 2000. Classification, identification, and  
566 clinical significance of *Proteus*, *Providencia*, and *Morganella*. *Clin Microbiol*  
567 *Rev* 13:534–546.
- 568 41. Rózalski A, Sidorczyk Z, Kotełko K. 1997. Potential virulence factors of *Proteus*  
569 *bacilli*. *Microbiol Mol Biol Rev* 61:65–89.
- 570 42. Ahmad I, Nygren E, Khalid F, Myint SL, Uhlin BE. 2020. A Cyclic-di-GMP  
571 signalling network regulates biofilm formation and surface associated motility of  
572 *Acinetobacter baumannii* 17978. *Sci Rep* 10(21):1079-1081.
- 573 43. Vuotto C, Longo F, Pascolini C, Donelli G, Balice MP, Libori MF, Tiracchia V,  
574 Salvia A, Varaldo PE. 2014. Antibiotic Resistance Related to Biofilm Formation  
575 in *Klebsiella pneumoniae*. *Pathogens (Basel, Switzerland)* 3(3):743-58.
- 576 44. Podschun R, Ullmann U. 1998. *Klebsiella* spp. as nosocomial pathogens:  
577 epidemiology, taxonomy, typing methods, and pathogenicity factors. *Clin*  
578 *Microbiol Rev* 11(4):589-603.
- 579 45. Park MR, Shin M, Mun D, Jeong SY, Jeong DY, Song M, Ko G, Unno T, Kim Y,  
580 Oh S. 2020. Probiotic *Lactobacillus fermentum* strain JDFM216 improves  
581 cognitive behavior and modulates immune response with gut microbiota. *Sci Rep*  
582 10(1):21701.
- 583 46. Zhu WY, Yang L, Shi YJ, Mu CG, Wang Y, Kou YR, Yin M, Tang SK. 2020.

- 584 *Oceanobacillus halotolerans* sp. nov., a bacterium isolated from salt lake in  
585 Xinjiang province, north-west China. Arch Microbiol 202:1545–1549.
- 586 47. Nam H, Ha M, Bae O, Lee Y. 2002. Effect of *Weissella confusa* strain PL9001 on  
587 the adherence and growth of *Helicobacter pylori*. Appl Environ Microbiol  
588 68(9):4642-5.
- 589 48. Kang MS, Chung J, Kim SM, Yang KH, Oh JS. 2006. Effect of *Weissella cibaria*  
590 isolates on the formation of *Streptococcus mutans* biofilm. Caries Res 40(5):418-  
591 25.
- 592 49. Sriornual S, Yanagida F, Lin LH, Hsiao KN, Chen YS. 2007. Weisellucin 110, a  
593 newly discovered bacteriocin from *Weissella cibaria* 110, isolated from plaa-som,  
594 a fermented fish product from Thailand. Appl Environ Microbiol 73(7):2247-50.
- 595 50. Lee W, Cho SM, Kim M, Ko YG, Yong D, Lee K. 2013. *Weissella confusa*  
596 bacteremia in an immune-competent patient with underlying intramural  
597 hematomas of the aorta. Ann Lab Med 33(6):459-62.
- 598 51. Valerio F, Favilla M, De Bellis P, Sisto A, de Candia S, Lavermicocca P. 2009.  
599 Antifungal activity of strains of lactic acid bacteria isolated from a semolina  
600 ecosystem against *Penicillium roqueforti*, *Aspergillus niger* and *Endomyces*  
601 *fibuliger* contaminating bakery products. Syst Appl Microbiol 32(6):438-448.
- 602  
603  
604  
605  
606  
607  
608

609 **Tables**

610 Table 1: Changes of related parameters in different stages of composting process

| Samples | Composting time (d) | Viable count (CFU/g)  | pH   | Percentage of composting residue in machine volume |
|---------|---------------------|-----------------------|------|----------------------------------------------------|
| A1      | 1                   | $6.97 \times 10^{11}$ | 6.21 | 7.94%                                              |
| A2      | 7                   | $2.63 \times 10^8$    | 5.95 | 18.24%                                             |
| A3      | 15                  | $2.23 \times 10^6$    | 5.56 | 32.35%                                             |
| A4      | 20                  | $1.06 \times 10^6$    | 5.32 | 41.17%                                             |
| A5      | 30                  | $8.66 \times 10^5$    | 5.87 | 40.58%                                             |
| C1      | 1                   | $2.21 \times 10^6$    | 6.35 | 7.06%                                              |
| C2      | 7                   | $7.63 \times 10^7$    | 6.13 | 16.18%                                             |
| C3      | 15                  | $4.33 \times 10^5$    | 5.88 | 30.30%                                             |
| C4      | 20                  | $2.33 \times 10^5$    | 5.57 | 39.12%                                             |
| C5      | 30                  | $7.33 \times 10^4$    | 5.96 | 38.53%                                             |

611 Table 2: Statistics of optimized effective sequences and OTUs in each sample

| Sample | optimized effective sequences | OTUs | OTUs (without Chloroplast) |
|--------|-------------------------------|------|----------------------------|
| A1     | 131796                        | 388  | 387                        |
| A2     | 128788                        | 460  | 459                        |
| A3     | 130073                        | 1076 | 835                        |
| A4     | 132226                        | 1118 | 1100                       |
| A5     | 124344                        | 1349 | 1270                       |
| C1     | 133111                        | 1300 | 1300                       |

|    |        |      |      |
|----|--------|------|------|
| C2 | 132463 | 565  | 565  |
| C3 | 124660 | 1624 | 1620 |
| C4 | 127078 | 824  | 717  |
| C5 | 121536 | 622  | 396  |

612 Table 3: Alpha diversity index in each group

| Sample | Chao1 index | Shannon index | Simpson index | Coverage index |
|--------|-------------|---------------|---------------|----------------|
| A1     | 390         | 2.91          | 0.8172        | 0.999824       |
| A2     | 481         | 2.22          | 0.6058        | 0.999341       |
| A3     | 1119        | 3.68          | 0.7867        | 0.998544       |
| A4     | 1146        | 5.01          | 0.8860        | 0.998834       |
| A5     | 1380        | 5.31          | 0.8823        | 0.998801       |
| C1     | 1346        | 2.64          | 0.3926        | 0.998469       |
| C2     | 607         | 1.86          | 0.4941        | 0.999011       |
| C3     | 1632        | 6.61          | 0.9585        | 0.999083       |
| C4     | 848         | 4.11          | 0.7467        | 0.998987       |
| C5     | 650         | 3.36          | 0.7235        | 0.999132       |

613 Table 4: Primer information of PCR amplification

| Primer name                       | Pre-primer sequence | Post-primer sequence | length of Amplified fragment |
|-----------------------------------|---------------------|----------------------|------------------------------|
| V3 V4 region of standard bacteria | ACTCCTACGGGAGGCAGCA | GGACTACHVGGGTWTCTAAT | 500bp                        |

614 Amplification system (25 $\mu$ L): 5 $\times$ reaction buffer 5 $\mu$ L, 5 $\times$ GC buffer 5 $\mu$ L, dNTP  
615 (2.4mM) 2 $\mu$ L, Forwardprimer (10uM)1 $\mu$ L, Reverseprimer (10uM)1 $\mu$ L, DNA  
616 Template 2 $\mu$ L, ddH<sub>2</sub>O 8.75 $\mu$ L, Q5 DNA Polymerase 0.25 $\mu$ L  
617 Amplification parameters: Initial denaturation 98 $^{\circ}$ C 2min, Denaturation 98 $^{\circ}$ C 15s,  
618 Annealing 55 $^{\circ}$ C 30s, Extension 72 $^{\circ}$ C 30s, Final extension 72 $^{\circ}$ C 5min, 10 $^{\circ}$ C Hold,  
619 25-30Cycles.

620

621

622

623

624

625

626

627

628

629

630

631

632

633

634

635

636

637

638 **Figures**

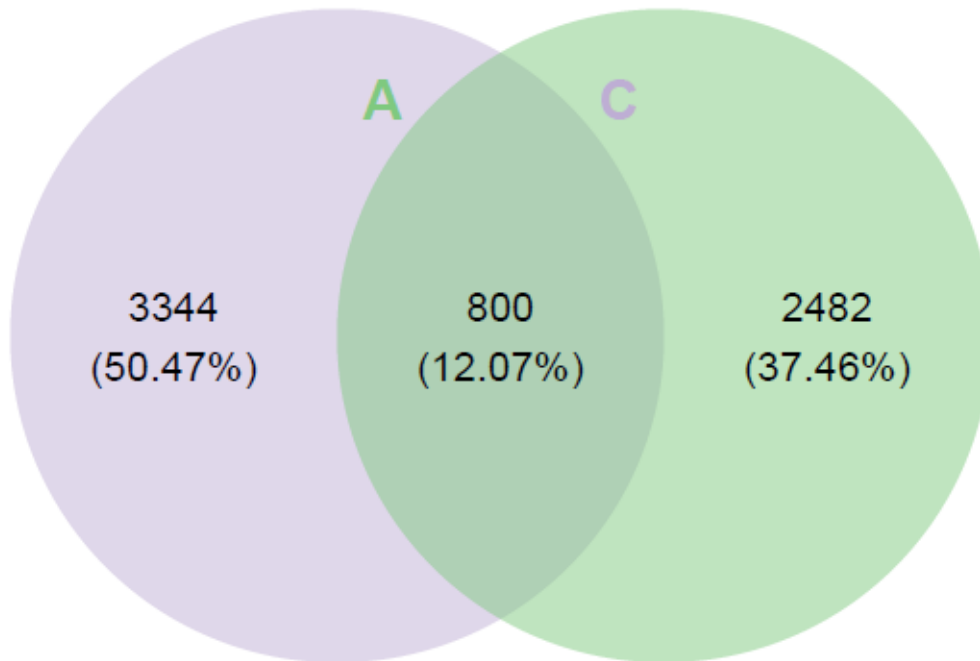

639

640 Figure 1 Venn graph analysis based on OTU number

641

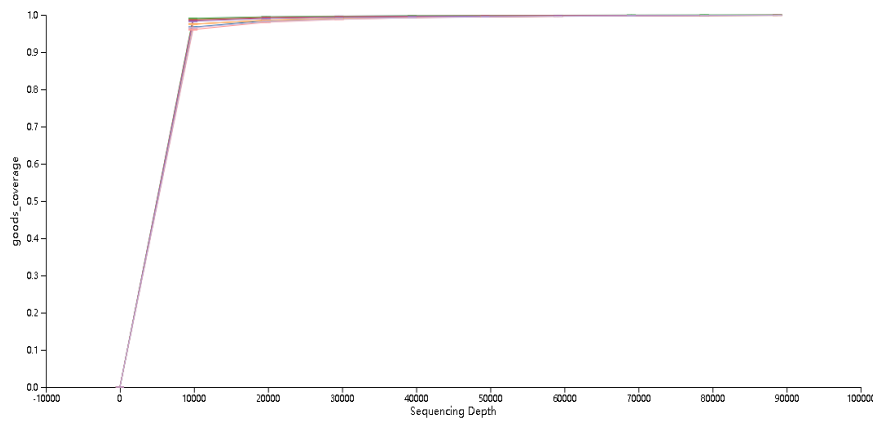

642

643 Figure 2(A) Coverage-Sequencing Depth Curve

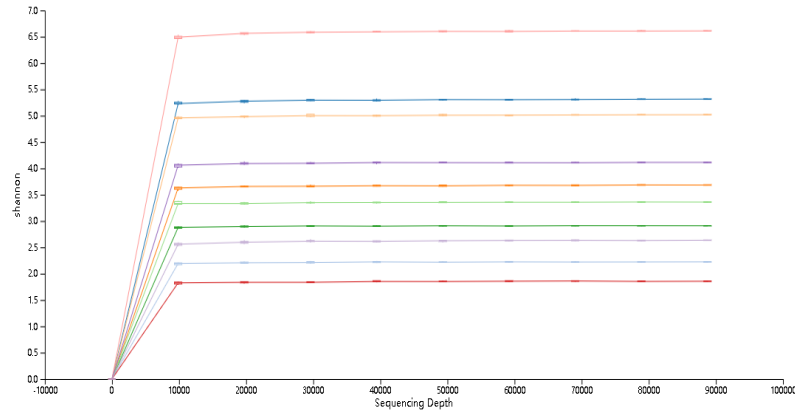

644

645 Figure 2(B) Shannon-Sequencing Depth Curve

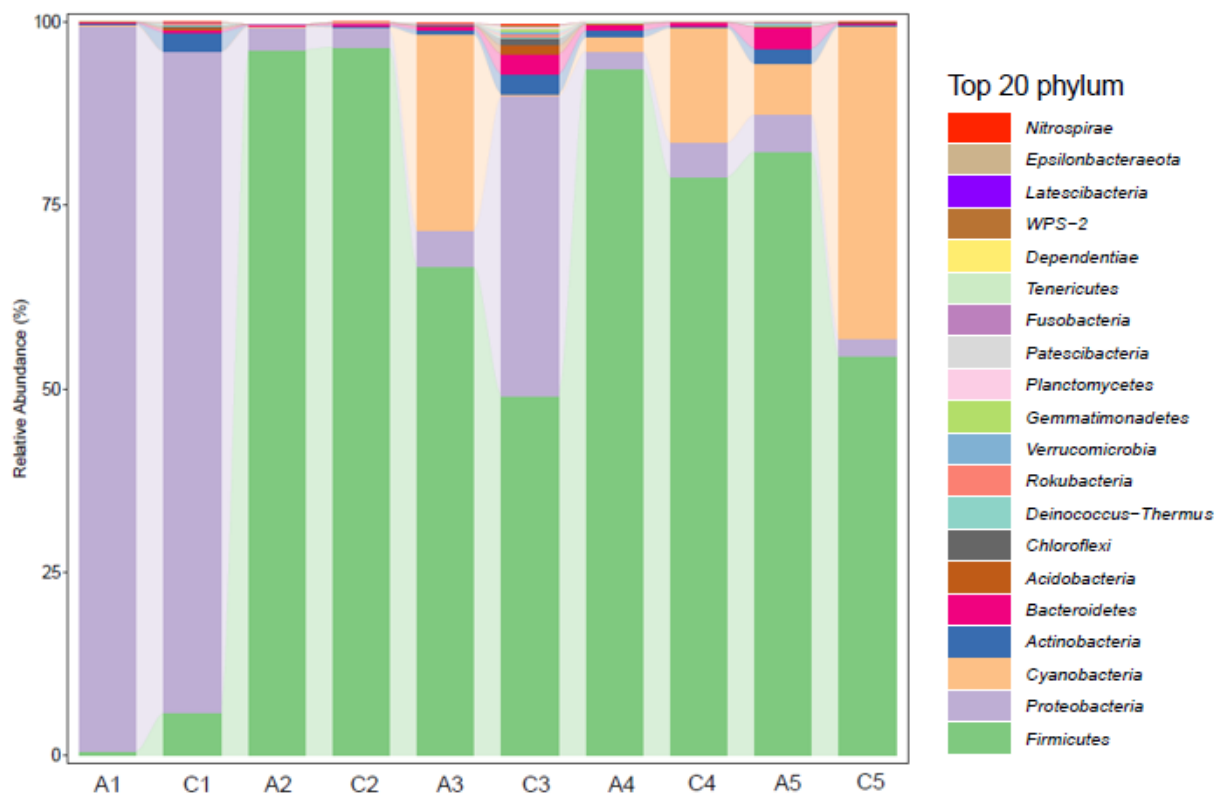

646

647 Figure 3 Bacteria composition at the level of phylum classification at different stages

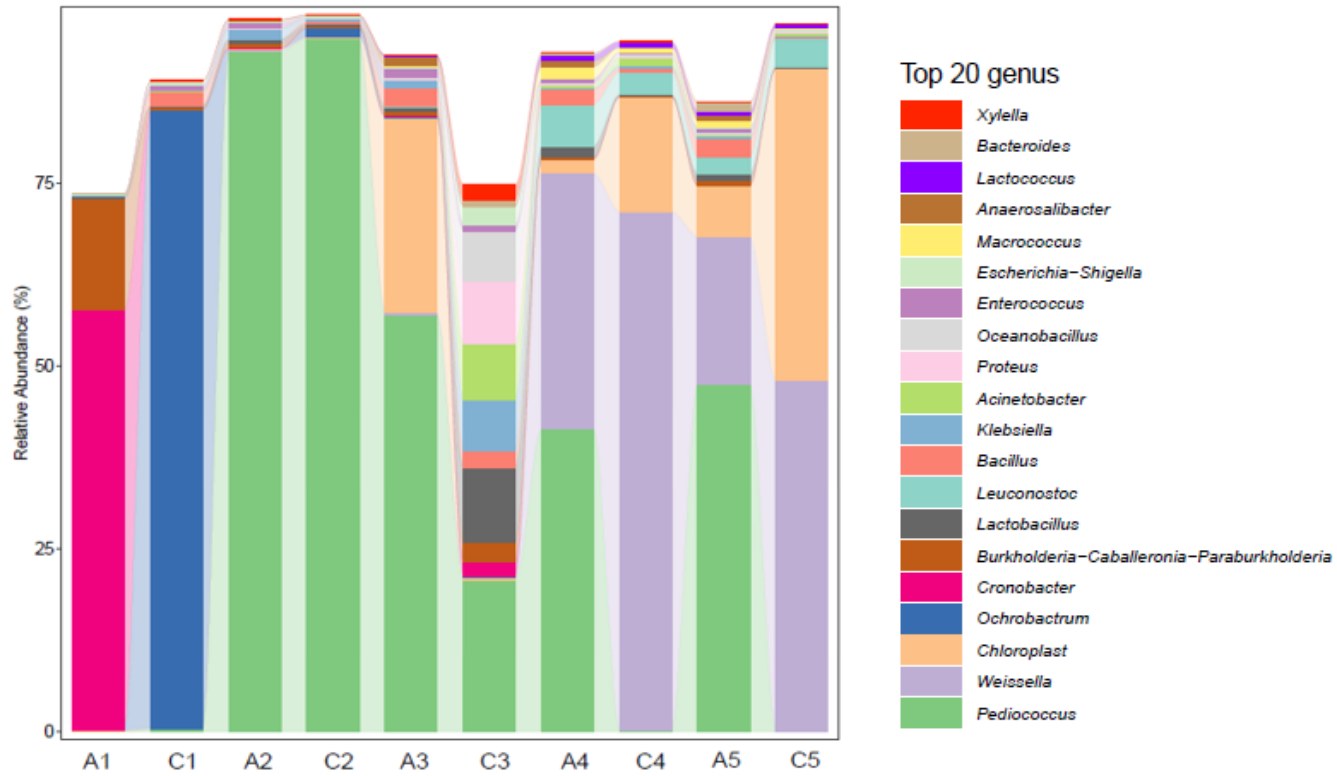

648

649 Figure 4 Bacteria composition at different stages of genus classification

650

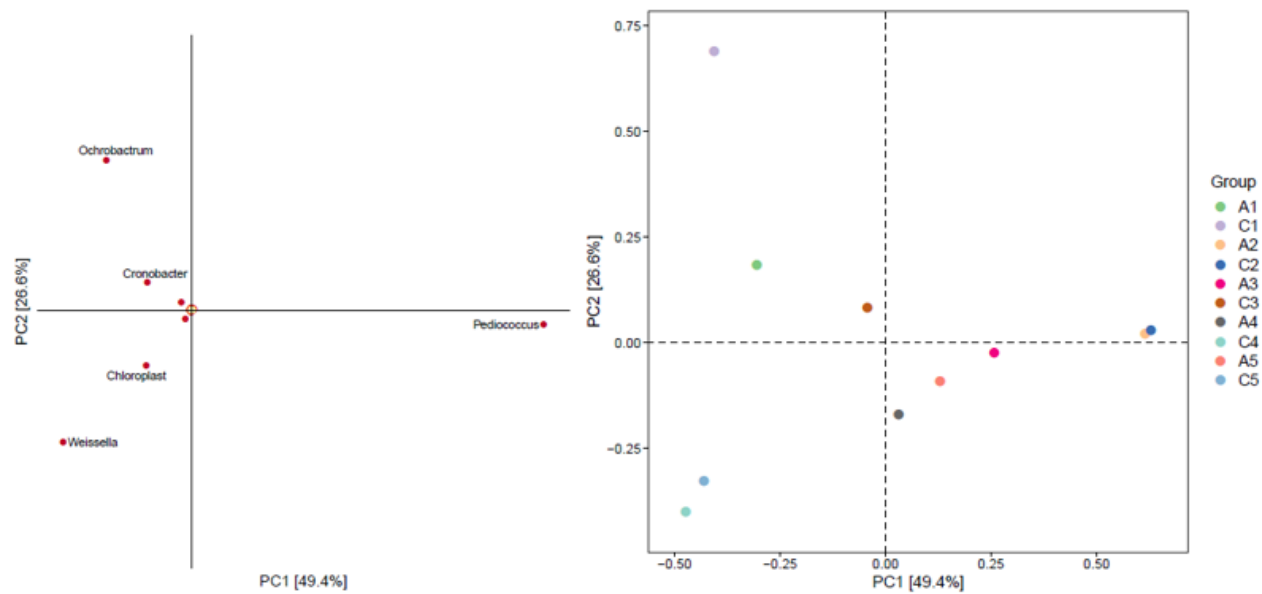

651

652 Figure 5 Analysis of PCoA in different samples

653

654
